# Supplementary material
Source: MDPI journal article supplement (https://www.mdpi.com/2073-445X/12/6/1155)
Supplement: s1 [file s1]

**Supplementary Table S1. Effect of tree-based land-use systems on SOC (Mg ha<sup>-1</sup>) at different soil depths**

| <b>Tree-based land-use system</b>              | <b>0-20 cm</b> | <b>20-40 cm</b> | <b>40-60 cm</b> | <b>Mean</b> |
|------------------------------------------------|----------------|-----------------|-----------------|-------------|
| <b>Forest</b>                                  |                |                 |                 |             |
| <i>Lagerstroemia parviflora</i>                | 40.88±0.91     | 39.99±0.96      | 32.90±0.81      | 37.92b      |
| <i>Michelia champaca</i>                       | 40.12±1.01     | 36.95±1.07      | 31.66±1.02      | 36.24cd     |
| <i>Tectona grandis</i>                         | 39.52±0.59     | 35.74±0.76      | 30.25±0.65      | 35.17de     |
| <i>Shorea robusta</i>                          | 41.17±1.15     | 40.18±0.48      | 29.48±0.61      | 36.94bc     |
| Mixed                                          | 47.06±1.14     | 47.13±1.90      | 32.48±1.33      | 42.22a      |
| <b>Forest Tree Plantation</b>                  |                |                 |                 |             |
| <i>Swietenia macrophylla</i>                   | 23.55±0.40     | 21.58±1.36      | 19.45±0.95      | 21.53gh     |
| <i>Anthocephalus cadamba</i>                   | 23.78±0.38     | 20.49±0.55      | 19.37±0.29      | 21.21ghi    |
| <i>Gmelina arborea</i>                         | 22.95±0.64     | 19.06±1.29      | 17.99±0.74      | 20.00hijkl  |
| <i>Shorea borneensis</i>                       | 23.01±0.94     | 19.66±0.44      | 17.36±0.39      | 20.01hijkl  |
| <i>Tectona grandis</i>                         | 23.33±1.86     | 19.55±0.53      | 18.62±0.73      | 20.50ghijkl |
| <i>Lagerstroemia indica</i>                    | 23.47±1.35     | 19.96±0.30      | 17.03±0.60      | 20.16hijkl  |
| <i>Tectona grandis</i> + <i>Milvus migrans</i> | 23.45±1.21     | 18.96±0.32      | 17.58±1.02      | 20.00hijkl  |
| A c + S m                                      | 23.05±1.51     | 19.71±0.64      | 17.32±0.62      | 20.03hijkl  |
| <b>Agroforestry</b>                            |                |                 |                 |             |
| <i>Albizia lebbek</i> based                    | 24.56±0.95     | 20.63±0.47      | 16.66±0.71      | 20.62ghijkl |
| <i>Swietenia macrophylla</i> based             | 25.77±0.69     | 19.35±0.38      | 17.37±0.58      | 20.83ghijk  |
| <i>Terminalia arjuna</i> based                 | 24.56±0.65     | 19.48±0.32      | 16.54±0.39      | 20.19hijkl  |
| <i>Gmelina arborea</i> based                   | 25.23±1.50     | 19.77±0.45      | 16.91±0.67      | 20.64ghijkl |
| <i>Millettia pinnata</i> based                 | 23.26±1.11     | 19.45±0.24      | 18.31±0.10      | 20.34ghijkl |
| <i>Lagerstroemia indica</i> based              | 25.83±0.95     | 20.69±0.19      | 18.92±0.29      | 20.81g      |
| <i>Anthocephalus cadamba</i> based             | 24.02±1.30     | 19.26±0.96      | 18.66±0.70      | 20.65hijkl  |
| <i>Mangifera indica</i> based                  | 24.22±1.25     | 19.63±0.39      | 17.06±0.71      | 20.30ghijkl |
| Homegarden                                     | 34.98±1.18     | 28.23±1.44      | 27.13±0.71      | 30.11f      |
| <b>Commercial Crop Plantation</b>              |                |                 |                 |             |
| <i>Hevea brasiliensis</i>                      | 24.27±1.45     | 19.27±0.86      | 16.51±0.88      | 20.02hijkl  |
| <i>Cocos nucifera</i>                          | 24.67±0.37     | 18.82±0.56      | 17.32±0.63      | 20.27hijkl  |
| <i>Areca catechu</i>                           | 25.54±0.67     | 19.73±0.38      | 18.32±0.50      | 21.20ghi    |
| <i>Machilus bombycina</i>                      | 24.53±1.16     | 19.95±0.25      | 18.77±0.15      | 21.08ghij   |
| Tea plantations                                | 39.93±1.26     | 33.57±0.92      | 29.69±0.44      | 34.40e      |
| <b>Fruit Orchard</b>                           |                |                 |                 |             |
| <i>Psidium guajava</i>                         | 24.28±0.58     | 18.81±1.07      | 16.32±0.58      | 19.80ijkl   |
| <i>Manilkara zapota</i>                        | 24.02±0.85     | 18.28±0.68      | 17.74±1.21      | 20.01hijkl  |
| <i>Litchi chinensis</i>                        | 23.82±0.61     | 18.31±0.63      | 15.33±0.53      | 19.15l      |
| <i>Anacardium occidentale</i>                  | 23.61±0.55     | 18.45±0.51      | 16.65±0.45      | 19.57jkl    |
| <i>Citrus lemon</i>                            | 22.55±1.13     | 18.90±0.87      | 16.18±1.17      | 19.2ll      |
| <i>Mangifera indica</i>                        | 23.56±0.55     | 18.15±0.73      | 16.60±0.59      | 19.44kl     |
| Mean                                           | 27.53a         | 23.26b          | 20.26c          |             |

A c + S m- *Anthocephalus cadamba* + *Swietenia macrophylla*

**Supplementary Table S2. Effect of tree-based land-use systems on biomass accumulation and partitioning (Mg ha<sup>-1</sup>)**

| TBL                         | Biomass            |                  |                  | TSB               | AGB               | BGB               | LB               | TB                |
|-----------------------------|--------------------|------------------|------------------|-------------------|-------------------|-------------------|------------------|-------------------|
|                             | Tree               | Shrub            | Herb             |                   |                   |                   |                  |                   |
| Forest                      |                    |                  |                  |                   |                   |                   |                  |                   |
| L p                         | 130.36<br>*(2.12)c | 11.39<br>(1.1)c  | 3.22<br>(0.62)c  | 144.97<br>(2.16)c | 126.06<br>(2.10)c | 18.91<br>(1.30)c  | 14.10<br>(1.17)a | 159.07<br>(2.21)c |
| M c                         | 139.68<br>(2.15)c  | 10.54<br>(1.1)c  | 4.13<br>(0.71)b  | 154.36<br>(2.19)c | 134.23<br>(2.13)c | 20.13<br>(1.33)c  | 9.35<br>(1.01)b  | 168.84<br>(2.22)c |
| T g                         | 140.70<br>(2.15)c  | 10.19<br>(1.1)c  | 3.39<br>(0.64)c  | 154.29<br>(2.19)c | 134.16<br>(2.13)c | 20.12<br>(1.33)c  | 14.48<br>(1.19)a | 163.64<br>(2.23)c |
| S r                         | 256.02<br>(2.41)b  | 7.44<br>(0.9)d   | 2.81<br>(0.6)cd  | 266.26<br>(2.43)b | 231.53<br>(2.37)b | 34.73<br>(1.55)b  | 12.43<br>(1.13)a | 278.69<br>(2.45)b |
| Mixed                       | 743.19<br>(2.87)a  | 17.80<br>(1.3)b  | 6.62<br>(0.88)a  | 767.61<br>(2.88)a | 667.49<br>(2.82)a | 100.12<br>(2.00)a | 13.60<br>(1.16)a | 781.21<br>(2.89)a |
| Forest Tree Plantation      |                    |                  |                  |                   |                   |                   |                  |                   |
| S m                         | 39.13<br>(1.60)h   | 2.06<br>(0.5)g   | 0.93<br>(0.3)gh  | 42.12<br>(1.64)h  | 36.63<br>(1.58)h  | 5.49<br>(0.82)g   | 3.58<br>(0.66)d  | 45.70<br>(1.68)i  |
| A c                         | 58.28<br>(1.77)f   | 0.90<br>(0.5)jkl | 1.16<br>(0.33)g  | 60.34<br>(1.79)g  | 52.47<br>(1.73)g  | 7.87<br>(0.95)f   | 3.51<br>(0.65)a  | 63.85<br>(1.8)gh  |
| G a                         | 27.36<br>(1.45)ij  | 1.54<br>(0.3)hi  | 0.91<br>(0.3)gh  | 29.82<br>(1.49)i  | 25.93<br>(1.43)i  | 3.89<br>(0.69)h   | 2.32<br>(0.52)e  | 32.14<br>(1.52)j  |
| S b                         | 27.60<br>(1.45)ij  | 1.97<br>(0.5)gh  | 0.86<br>(0.3)gh  | 30.44<br>(1.49)i  | 26.47<br>(1.44)i  | 3.97<br>(0.69)h   | 1.73<br>(0.43)f  | 32.17<br>(1.52)j  |
| T g                         | 22.65<br>(1.4)jkl  | 1.89<br>(0.3)gh  | 0.91<br>(0.3)gh  | 25.44<br>(1.42)ij | 22.12<br>(1.36)ij | 3.32<br>(0.6)hij  | 0.97<br>(0.1)gh  | 26.41<br>(1.4)jkl |
| L i                         | 39.04<br>(1.60)h   | 1.55<br>(0.4)hi  | 2.35<br>(0.3)de  | 42.95<br>(1.63)h  | 37.34<br>(1.57)h  | 5.60<br>(0.81)g   | 4.53<br>(0.44)c  | 47.47<br>(1.67)i  |
| Tg+Mm                       | 82.21<br>(1.92)e   | 1.18<br>(0.34)ij | 0.84<br>(0.26)h  | 84.23<br>(1.9)ef  | 73.25<br>(1.87)ef | 10.99<br>(1.08)e  | 1.74<br>(0.44)f  | 85.97<br>(1.9)ef  |
| Ac+Sm                       | 103.36<br>(2.02)d  | 5.54<br>(0.81)e  | 2.11<br>(0.49)e  | 111.56<br>(2.05)d | 97.01<br>(1.99)d  | 14.55<br>(1.19)d  | 0.30<br>(0.11)i  | 111.86<br>(2.05)d |
| Agroforestry                |                    |                  |                  |                   |                   |                   |                  |                   |
| A l b                       | 17.66<br>(1.3)mn   | 0.80<br>(0.25)kl | 0.04<br>(0.02)k  | 18.49<br>(1.29)l  | 16.08<br>(1.23)l  | 2.41<br>(0.53)kl  | 0.06<br>(0.03)jk | 18.56<br>(1.29)h  |
| S m b                       | 79.44<br>(1.90)e   | 1.31<br>(0.47)i  | 0.06<br>(0.27)k  | 80.81<br>(1.9)ef  | 70.27<br>(1.85)ef | 10.54<br>(1.06)e  | 3.01<br>(0.60)d  | 83.82<br>(1.9)ef  |
| T a b                       | 25.52<br>(1.4)ijk  | 0.50<br>(0.2)mn  | 0.12<br>(0.05)k  | 26.14<br>(1.43)ij | 22.73<br>(1.37)ij | 3.41<br>(0.64)hi  | 0.02<br>(0.01)k  | 26.15<br>(1.4)kl  |
| G a b                       | 28.30<br>(1.47)i   | 1.95<br>(0.36)gh | 0.50<br>(0.11)i  | 30.75<br>(1.50)i  | 26.74<br>(1.44)i  | 4.01<br>(0.70 )h  | 0.03<br>(0.01)k  | 30.78<br>(1.5)jk  |
| M p b                       | 13.54<br>(1.2)op   | 0.33<br>(0.12)no | 0.06<br>(0.03)k  | 13.93<br>(1.2)m   | 12.11<br>(1.12)m  | 1.82<br>(0.5)mn   | 0.08<br>(0.03)jk | 14.01<br>(1.17)o  |
| L i b                       | 15.86<br>(1.2)no   | 0.64<br>(0.17)lm | 0.88<br>(0.03)gh | 17.38<br>(1.26)l  | 15.11<br>(1.20)l  | 2.27<br>(0.5)lm   | 0.04<br>(0.02)k  | 17.42<br>(1.26)n  |
| A c b                       | 49.21<br>(1.7)fg   | 1.34<br>(0.37)i  | 0.31<br>(0.18)j  | 50.86<br>(1.7)gh  | 44.23<br>(1.7)gh  | 6.63<br>(0.88)f   | 1.04<br>(0.3)gh  | 51.9<br>(1.72)i   |
| M i b                       | 19.36<br>(1.3)lmn  | 0.94<br>(0.25)jk | 0.06<br>(0.05)k  | 20.36<br>(1.3)kl  | 17.71<br>(1.27)kl | 2.66<br>(0.56)kl  | 0.07<br>(0.03)jk | 20.44<br>(1.3)mn  |
| Hg                          | 90.16<br>(1.9)de   | 2.72<br>(0.57)f  | 1.52<br>(0.40)f  | 94.41<br>(1.9)de  | 82.09<br>(1.9)de  | 12.31<br>(1.12)e  | 2.97<br>(0.60)d  | 97.38<br>(1.9)de  |
| Commercial Plantation Crops |                    |                  |                  |                   |                   |                   |                  |                   |
| H b                         | 51.35<br>(1.72)fg  | 0.75<br>(0.24)ij | 0.75<br>(0.24)h  | 53.36<br>(1.73)g  | 46.40<br>(1.67)g  | 6.96<br>(0.90)f   | 1.25<br>(0.35)g  | 54.60<br>(1.7)hi  |

|                      |                   |                  |                  |                  |                   |                  |                  |                  |
|----------------------|-------------------|------------------|------------------|------------------|-------------------|------------------|------------------|------------------|
| C n                  | 20.71<br>(1.3)klm | 0.07<br>(0.03)p  | 0.05<br>(0.02)k  | 20.83<br>(1.3)kl | 18.11<br>(1.28)kl | 2.72<br>(0.6)jkl | 0.04<br>(0.02)k  | 20.87<br>(1.3)mn |
| A c                  | 17.85<br>(1.3)mn  | 0.06<br>(0.03)p  | 0.08<br>(0.03)k  | 17.99<br>(1.28)l | 15.64<br>(1.22)l  | 2.35<br>(0.52)l  | 0.02<br>(0.01)k  | 18.01<br>(1.28)n |
| M b                  | 17.44<br>(1.3)mn  | 0.73<br>(0.2)klm | 1.61<br>(0.42)f  | 19.78<br>(1.32)l | 17.20<br>(1.26)kl | 2.58<br>(0.6)kl  | 1.06<br>(0.3)gh  | 20.85<br>(1.3)mn |
| T P                  | 47.17<br>(1.7)gh  | 29.24<br>(1.48)a | 0.41<br>(0.15)ij | 76.82<br>(1.88)f | 65.30<br>(1.81)f  | 11.52<br>(1.09)e | 0.25<br>(0.10)ij | 77.07<br>(1.9)fg |
| <b>Fruit Orchard</b> |                   |                  |                  |                  |                   |                  |                  |                  |
| P g                  | 6.32<br>(0.9)qr   | 0.29<br>(0.11)o  | 0.06<br>(0.02)k  | 6.66<br>(0.9)no  | 5.79<br>(0.8)no   | 0.87<br>(0.27)o  | 0.02<br>(0.01)k  | 6.68<br>(0.9)pq  |
| M z                  | 12.54<br>(1.13)p  | 0.17<br>(0.07)op | 0.08<br>(0.03)k  | 12.79<br>(1.1)m  | 11.12<br>(1.08)m  | 1.67<br>(0.42)n  | 0.11<br>(0.1)jk  | 12.90<br>(1.14)o |
| L c                  | 7.82<br>(0.94)q   | 0.06<br>(0.03)p  | 0.07<br>(0.03)k  | 7.95<br>(0.95)n  | 6.92<br>(0.90)n   | 1.04<br>(0.31)o  | 0.09<br>(0.04)jk | 8.05<br>(0.95)p  |
| A o                  | 17.86<br>(1.3)mn  | 0.14<br>(0.06)op | 0.06<br>(0.03)k  | 18.07<br>(1.28)l | 15.71<br>(1.22)l  | 2.36<br>(0.53)l  | 0.88<br>(0.27)h  | 18.95<br>(1.30)n |
| C l                  | 6.15<br>(0.85)r   | 0.04<br>(0.02)p  | 0.01<br>(0.00)k  | 6.20<br>(0.86)o  | 5.40<br>(0.81)o   | 0.81<br>(0.26)o  | 0.07<br>(0.03)jk | 6.27<br>(0.9)q   |
| M i                  | 22.63<br>(1.4)jkl | 0.19<br>(0.08)op | 0.07<br>(0.03)k  | 22.89<br>(1.4)jk | 19.90<br>(1.32)jk | 2.99<br>(0.6)ijk | 0.81<br>(0.26)h  | 23.70<br>(1.4)lm |
| S <sub>em</sub>      | <b>0.03</b>       | <b>0.02</b>      | <b>0.02</b>      | <b>0.03</b>      | <b>0.03</b>       | <b>0.02</b>      | <b>0.02</b>      | <b>0.03</b>      |
| CD <sub>p=0.05</sub> | <b>0.08</b>       | <b>0.06</b>      | <b>0.06</b>      | <b>0.08</b>      | <b>0.08</b>       | <b>0.06</b>      | <b>0.06</b>      | <b>0.08</b>      |

\*figures in parenthesis are log transformed values; TBLS- Tree-based land-use system; *L p*- *Lagerstroemia parviflora*; *M c*- *Michelia champaca*; *T g*- *Tectona grandis*; *S r*- *Shorea robusta*; *S m*- *Swietenia macrophylla*; *A c*- *Anthocephalus cadamba*; *G a*- *Gmelina arborea*; *S b*- *Shorea borneensis*; *L i*- *Lagerstroemia indica*; *M m*- *Milvus migrans*; *A l b*- *Albizia lebbek* based; *S m b*- *Swietenia macrophylla* based; *T a b*- *Terminalia arjuna* based; *G a b*- *Gmelina arborea* based; *M p b*- *Millettia pinnata* based; *L i b*- *Lagerstroemia indica* based; *A c b*- *Anthocephalus cadamba* based; *M i b*- *Mangifera indica* based; Hg- homegarden; *H b*- *Hevea brasiliensis*; *C n*- *Cocos nucifera*; *A c*- *Areca catechu*; *M b*- *Machilus bombycina*; T P- tea plantation; *P g*- *Psidium guajava*; *M z*- *Manilkara zapota*; *L c*- *Litchi chinensis*; *A o*- *Anacardium occidentale*; *C l*- *Citrus lemon*; *M i*- *Mangifera indica*; TSB- total standing biomass; AGB- above ground biomass; BGB- below ground biomass; L B- litter biomass; TB- total biomass

**Supplementary Table S3. Effect of tree-based land-use systems on soil EC (dS m<sup>-1</sup>) at different depths**

| Tree-based land-use system                     | 0-20 cm      | 20-40 cm     | 40-60 cm     | Mean       |
|------------------------------------------------|--------------|--------------|--------------|------------|
| <b>Forest</b>                                  |              |              |              |            |
| <i>Lagerstroemia parviflora</i>                | 0.25±0.01    | 0.24±0.01    | 0.20±0.01    | 0.23cd     |
| <i>Michelia champaca</i>                       | 0.27±0.01    | 0.25±0.01    | 0.23±0.03    | 0.25bc     |
| <i>Tectona grandis</i>                         | 0.28±0.01    | 0.24±0.03    | 0.22±0.01    | 0.24bcd    |
| <i>Shorea robusta</i>                          | 0.27±0.01    | 0.26±0.01    | 0.24±0.03    | 0.26b      |
| Mixed                                          | 0.30±0.02    | 0.28±0.02    | 0.26±0.03    | 0.28a      |
| <b>Forest Tree Plantation</b>                  |              |              |              |            |
| <i>Swietenia macrophylla</i>                   | 0.21±0.01    | 0.21±0.02    | 0.18±0.02    | 0.20fg     |
| <i>Anthocephalus cadamba</i>                   | 0.20±0.01    | 0.20±0.02    | 0.19±0.02    | 0.20fg     |
| <i>Gmelina arborea</i>                         | 0.24±0.02    | 0.21±0.03    | 0.17±0.03    | 0.21ef     |
| <i>Shorea borneensis</i>                       | 0.23±0.01    | 0.18±0.02    | 0.15±0.01    | 0.18fghijk |
| <i>Tectona grandis</i>                         | 0.22±0.01    | 0.20±0.01    | 0.19±0.02    | 0.20ef     |
| <i>Lagerstroemia indica</i>                    | 0.20±0.01    | 0.19±0.02    | 0.17±0.02    | 0.19fghij  |
| <i>Tectona grandis</i> + <i>Milvus migrans</i> | 0.20±0.00    | 0.19±0.01    | 0.19±0.02    | 0.20fg     |
| A c + S m                                      | 0.19±0.01    | 0.15±0.01    | 0.13±0.02    | 0.16lmn    |
| <b>Agroforestry</b>                            |              |              |              |            |
| <i>Albizia lebbek</i> based                    | 0.20±0.01    | 0.16±0.02    | 0.15±0.01    | 0.17hijklm |
| <i>Swietenia macrophylla</i> based             | 0.18±0.01    | 0.16±0.02    | 0.16±0.02    | 0.16jklm   |
| <i>Terminalia arjuna</i> based                 | 0.20±0.01    | 0.19±0.01    | 0.18±0.02    | 0.19fgh    |
| <i>Gmelina arborea</i> based                   | 0.17±0.01    | 0.17±0.03    | 0.16±0.01    | 0.17de     |
| <i>Millettia pinnata</i> based                 | 0.22±0.01    | 0.19±0.01    | 0.18±0.02    | 0.20ijklm  |
| <i>Lagerstroemia indica</i> based              | 0.19±0.01    | 0.19±0.01    | 0.13±0.01    | 0.17fg     |
| <i>Anthocephalus cadamba</i> based             | 0.20±0.02    | 0.19±0.02    | 0.19±0.03    | 0.19hijklm |
| <i>Mangifera indica</i> based                  | 0.21±0.01    | 0.19±0.02    | 0.16±0.01    | 0.19fgh    |
| Homegarden                                     | 0.24±0.01    | 0.23±0.02    | 0.21±0.03    | 0.22fghij  |
| <b>Commercial Crop Plantation</b>              |              |              |              |            |
| <i>Hevea brasiliensis</i>                      | 0.19±0.01    | 0.16±0.03    | 0.13±0.02    | 0.16de     |
| <i>Cocos nucifera</i>                          | 0.20±0.03    | 0.18±0.02    | 0.15±0.02    | 0.18klm    |
| <i>Areca catechu</i>                           | 0.19±0.02    | 0.18±0.03    | 0.17±0.02    | 0.16ghijkl |
| <i>Machilus bombycina</i>                      | 0.20±0.01    | 0.18±0.02    | 0.15±0.02    | 0.18ghijkl |
| Tea plantations                                | 0.25±0.02    | 0.23±0.01    | 0.22±0.01    | 0.23cd     |
| <b>Fruit Orchard</b>                           |              |              |              |            |
| <i>Psidium guajava</i>                         | 0.17±0.01    | 0.16±0.03    | 0.14±0.03    | 0.16lmn    |
| <i>Manilkara zapota</i>                        | 0.16±0.01    | 0.14±0.01    | 0.15±0.02    | 0.15mn     |
| <i>Litchi chinensis</i>                        | 0.16±0.01    | 0.13±0.03    | 0.13±0.02    | 0.14m      |
| <i>Anacardium occidentale</i>                  | 0.19±0.01    | 0.19±0.02    | 0.15±0.01    | 0.18ghijkl |
| <i>Citrus lemon</i>                            | 0.20±0.01    | 0.19±0.02    | 0.17±0.01    | 0.19fghi   |
| <i>Mangifera indica</i>                        | 0.22±0.01    | 0.20±0.03    | 0.15±0.02    | 0.19fghij  |
| <b>Mean</b>                                    | <b>0.21a</b> | <b>0.19b</b> | <b>0.18c</b> |            |

A c + S m- *Anthocephalus cadamba* + *Swietenia macrophylla*

**Supplementary Table S4. Effect of tree-based land-use systems on soil pH at different depths**

| <b>Tree-based land-use system</b>              | <b>0-20 cm</b> | <b>20-40 cm</b> | <b>40-60 cm</b> | <b>Mean</b>  |
|------------------------------------------------|----------------|-----------------|-----------------|--------------|
| <b>Forest</b>                                  |                |                 |                 |              |
| <i>Lagerstroemia parviflora</i>                | 4.64±0.04      | 4.74±0.04       | 5.17±0.07       | 4.85pq       |
| <i>Michelia champaca</i>                       | 4.73±0.07      | 4.90±0.04       | 5.20±0.03       | 4.94p        |
| <i>Tectona grandis</i>                         | 4.72±0.09      | 4.74±0.07       | 5.11±0.02       | 4.86pq       |
| <i>Shorea robusta</i>                          | 5.69±0.11      | 5.82±0.05       | 5.79±0.09       | 5.77abc      |
| Mixed                                          | 4.23±0.07      | 5.06±0.08       | 5.16±0.04       | 4.82q        |
| <b>Forest Tree Plantation</b>                  |                |                 |                 |              |
| <i>Swietenia macrophylla</i>                   | 5.45±0.04      | 5.73±0.08       | 5.55±0.05       | 5.58ghijk    |
| <i>Anthocephalus cadamba</i>                   | 5.11±0.02      | 5.23±0.05       | 5.38±0.05       | 5.24o        |
| <i>Gmelina arborea</i>                         | 5.19±0.11      | 5.41±0.08       | 5.54±0.12       | 5.38mn       |
| <i>Shorea borneensis</i>                       | 5.74±0.05      | 5.85±0.05       | 5.82±0.07       | 5.80a        |
| <i>Tectona grandis</i>                         | 5.73±0.05      | 5.86±0.05       | 5.83±0.05       | 5.81a        |
| <i>Lagerstroemia indica</i>                    | 5.68±0.10      | 5.77±0.09       | 5.73±0.06       | 5.73abcdef   |
| <i>Tectona grandis</i> + <i>Milvus migrans</i> | 5.45±0.09      | 5.61±0.10       | 5.83±0.06       | 5.63efghij   |
| A c + S m                                      | 5.59±0.05      | 5.58±0.09       | 5.84±0.06       | 5.67bcdefgh  |
| <b>Agroforestry</b>                            |                |                 |                 |              |
| <i>Albizia lebbek</i> based                    | 5.46±0.08      | 5.78±0.02       | 5.64±0.06       | 5.63efghij   |
| <i>Swietenia macrophylla</i> based             | 5.47±0.11      | 5.66±0.03       | 5.48±0.05       | 5.54ijk      |
| <i>Terminalia arjuna</i> based                 | 5.43±0.06      | 5.67±0.05       | 5.73±0.06       | 5.61efghijk  |
| <i>Gmelina arborea</i> based                   | 5.34±0.08      | 5.58±0.03       | 5.68±0.05       | 5.53ijk      |
| <i>Millettia pinnata</i> based                 | 5.56±0.04      | 5.67±0.05       | 5.71±0.06       | 5.65cdefghij |
| <i>Lagerstroemia indica</i> based              | 5.45±0.09      | 5.75±0.04       | 5.74±0.04       | 5.64cdefghi  |
| <i>Anthocephalus cadamba</i> based             | 5.65±0.08      | 5.8±0.07        | 5.76±0.09       | 5.74abcde    |
| <i>Mangifera indica</i> based                  | 5.22±0.08      | 5.4±0.04        | 5.62±0.06       | 5.41lmn      |
| Homegarden                                     | 5.19±0.05      | 5.23±0.03       | 5.35±0.09       | 5.23o        |
| <b>Commercial Crop Plantation</b>              |                |                 |                 |              |
| <i>Hevea brasiliensis</i>                      | 5.74±0.10      | 5.74±0.06       | 5.79±0.10       | 5.76abcd     |
| <i>Cocos nucifera</i>                          | 5.56±0.11      | 5.65±0.03       | 5.77±0.04       | 5.52jkl      |
| <i>Areca catechu</i>                           | 5.44±0.10      | 5.51±0.04       | 5.62±0.02       | 5.52ijkl     |
| <i>Machilus bombycina</i>                      | 5.19±0.08      | 5.24±0.06       | 5.33±0.04       | 5.25o        |
| Tea plantations                                | 5.10±0.04      | 5.16±0.09       | 5.67±0.08       | 5.30no       |
| <b>Fruit Orchard</b>                           |                |                 |                 |              |
| <i>Psidium guajava</i>                         | 5.14±0.08      | 5.23±0.05       | 5.35±0.06       | 5.24o        |
| <i>Manilkara zapota</i>                        | 5.67±0.05      | 5.84±0.05       | 5.84±0.04       | 5.78ab       |
| <i>Litchi chinensis</i>                        | 5.57±0.11      | 5.80±0.07       | 5.90±0.03       | 5.76abc      |
| <i>Anacardium occidentale</i>                  | 5.51±0.07      | 5.69±0.09       | 5.72±0.08       | 5.64defghij  |
| <i>Citrus lemon</i>                            | 5.64±0.09      | 5.65±0.05       | 5.80±0.09       | 5.70abcdefg  |
| <i>Mangifera indica</i>                        | 5.20±0.08      | 5.59±0.05       | 5.68±0.03       | 5.49klm      |
| Mean                                           | 5.38c          | 5.51b           | 5.59a           |              |

A c + S m- *Anthocephalus cadamba* + *Swietenia macrophylla*

**Supplementary Table S5. Effect of tree-based land-use systems on soil moisture (%) at different depths**

| <b>Tree-based land-use system</b>              | <b>0-20 cm</b> | <b>20-40 cm</b> | <b>40-60 cm</b> | <b>Mean</b>  |
|------------------------------------------------|----------------|-----------------|-----------------|--------------|
| <b>Forest</b>                                  |                |                 |                 |              |
| <i>Lagerstroemia parviflora</i>                | 27.33±0.22     | 28.70±0.38      | 30.73±0.71      | 28.92bcd     |
| <i>Michelia champaca</i>                       | 26.04±0.36     | 27.41±0.60      | 28.93±0.87      | 27.46defghij |
| <i>Tectona grandis</i>                         | 26.98±0.51     | 28.14±0.69      | 29.91±0.93      | 28.34cdefgh  |
| <i>Shorea robusta</i>                          | 25.95±0.72     | 25.25±0.67      | 24.03±0.29      | 25.08lm      |
| Mixed                                          | 30.10±0.53     | 32.46±0.69      | 33.18±0.38      | 31.92a       |
| <b>Forest Tree Plantation</b>                  |                |                 |                 |              |
| <i>Swietenia macrophylla</i>                   | 25.60±0.20     | 26.24±0.78      | 26.89±0.25      | 26.24ijkl    |
| <i>Anthocephalus cadamba</i>                   | 24.60±0.37     | 29.60±0.75      | 31.84±0.48      | 28.68cdef    |
| <i>Gmelina arborea</i>                         | 24.25±0.62     | 25.51±0.99      | 26.11±0.51      | 25.29klm     |
| <i>Shorea borneensis</i>                       | 21.25±0.63     | 28.82±0.64      | 28.89±0.55      | 26.32ijkl    |
| <i>Tectona grandis</i>                         | 24.60±0.61     | 27.94±0.42      | 28.53±0.09      | 27.02efghijk |
| <i>Lagerstroemia indica</i>                    | 27.83±0.50     | 29.30±0.26      | 30.79±0.65      | 29.31bc      |
| <i>Tectona grandis</i> + <i>Milvus migrans</i> | 26.50±0.63     | 28.63±0.22      | 29.66±0.28      | 28.26cdefgh  |
| A c + S m                                      | 22.91±0.44     | 25.31±0.35      | 25.26±0.18      | 24.49mn      |
| <b>Agroforestry</b>                            |                |                 |                 |              |
| <i>Albizia lebbek</i> based                    | 25.49±0.47     | 26.44±0.57      | 28.84±0.27      | 26.92fghijk  |
| <i>Swietenia macrophylla</i> based             | 26.78±0.92     | 28.61±0.66      | 29.89±0.15      | 28.43cdefg   |
| <i>Terminalia arjuna</i> based                 | 25.43±0.35     | 26.79±0.31      | 27.08±0.43      | 26.43ijkl    |
| <i>Gmelina arborea</i> based                   | 24.65±0.97     | 26.76±0.81      | 28.65±0.94      | 26.69ghijkl  |
| <i>Millettia pinnata</i> based                 | 25.02±0.47     | 25.32±0.61      | 27.11±0.91      | 26.48ijkl    |
| <i>Lagerstroemia indica</i> based              | 25.32±0.85     | 26.52±0.90      | 27.40±2.36      | 26.41ijkl    |
| <i>Anthocephalus cadamba</i> based             | 23.77±0.28     | 26.96±0.48      | 29.55±0.51      | 26.76ghijk   |
| <i>Mangifera indica</i> based                  | 25.02±0.88     | 25.32±0.64      | 27.11±4.71      | 25.82jklm    |
| Homegarden                                     | 25.99±0.58     | 26.98±0.88      | 29.55±1.01      | 27.5defghij  |
| <b>Commercial Crop Plantation</b>              |                |                 |                 |              |
| <i>Hevea brasiliensis</i>                      | 25.94±0.81     | 28.18±0.49      | 30.01±0.54      | 28.04cdefghi |
| <i>Cocos nucifera</i>                          | 25.26±0.60     | 27.12±0.63      | 28.97±0.59      | 27.12efghij  |
| <i>Areca catechu</i>                           | 25.19±0.33     | 30.66±0.95      | 30.33±0.11      | 28.73cde     |
| <i>Machilus bombycina</i>                      | 25.68±0.16     | 27.05±0.71      | 27.17±0.27      | 26.63hijkl   |
| Tea plantations                                | 29.50±0.66     | 30.70±0.60      | 31.16±0.43      | 30.45ab      |
| <b>Fruit Orchard</b>                           |                |                 |                 |              |
| <i>Psidium guajava</i>                         | 24.26±0.92     | 25.84±1.00      | 31.10±0.67      | 27.07efghij  |
| <i>Manilkara zapota</i>                        | 23.13±0.90     | 24.62±0.29      | 25.70±3.74      | 24.48mn      |
| <i>Litchi chinensis</i>                        | 25.97±0.11     | 26.15±0.52      | 27.14±1.03      | 26.42ijkl    |
| <i>Anacardium occidentale</i>                  | 22.22±0.79     | 23.37±0.75      | 24.74±0.50      | 23.44m       |
| <i>Citrus lemon</i>                            | 24.77±0.74     | 25.65±0.44      | 26.93±0.69      | 25.78jklm    |
| <i>Mangifera indica</i>                        | 24.27±0.44     | 26.97±0.60      | 27.91±0.05      | 26.38ijkl    |
| Mean                                           | 25.40c         | 26.89b          | 28.61a          |              |

A c + S m- *Anthocephalus cadamba* + *Swietenia macrophylla*

**Supplementary Table S6. Effect of tree-based land-use systems on soil available nitrogen (kg ha<sup>-1</sup>) at different depths**

| <b>TBLS</b>                       | <b>0-20 cm</b> | <b>20-40 cm</b> | <b>40-60 cm</b> | <b>Mean</b>   |
|-----------------------------------|----------------|-----------------|-----------------|---------------|
| <b>Forest</b>                     |                |                 |                 |               |
| L p                               | 250.72±7.32    | 217.80±11.26    | 190.92±3.24     | 219.82cd      |
| <i>Michelia champaca</i>          | 261.20±6.39    | 207.47±11.42    | 187.36±2.61     | 218.67cd      |
| <i>Tectona grandis</i>            | 243.06±3.08    | 208.76±6.64     | 181.76±1.99     | 211.19d       |
| <i>Shorea robusta</i>             | 245.87±4.19    | 223.52±9.83     | 214.85±3.99     | 228.08bc      |
| Mixed                             | 291.29±3.87    | 246.05±3.83     | 234.40±7.81     | 257.25a       |
| <b>Forest Tree Plantation</b>     |                |                 |                 |               |
| <i>Swietenia macrophylla</i>      | 197.70±7.22    | 164.23±6.36     | 124.40±7.81     | 162.11ghi     |
| A c                               | 191.97±2.74    | 150.75±5.82     | 112.82±1.47     | 151.85ijklmn  |
| <i>Gmelina arborea</i>            | 190.67±7.08    | 147.79±6.20     | 108.96±6.62     | 149.14klmn    |
| <i>Shorea borneensis</i>          | 192.22±6.02    | 132.00±9.17     | 127.32±2.18     | 150.52ijklmn  |
| <i>Tectona grandis</i>            | 188.09±6.92    | 129.33±3.93     | 110.22±2.44     | 142.55n       |
| <i>Lagerstroemia indica</i>       | 190.89±6.53    | 141.15±4.66     | 117.67±5.81     | 149.90jklm    |
| T g + M m                         | 198.78±5.96    | 157.00±5.01     | 125.67±5.70     | 160.48ghijk   |
| A c + S m                         | 192.83±6.87    | 134.71±3.83     | 113.33±2.60     | 146.96mn      |
| <b>Agroforestry</b>               |                |                 |                 |               |
| <i>Albizia lebbbeck</i> based     | 202.53±3.93    | 156.77±3.72     | 126.59±3.25     | 161.96ghi     |
| S m based                         | 204.65±4.18    | 141.12±4.47     | 137.67±1.45     | 161.14ghij    |
| T a based                         | 199.99±5.10    | 144.15±6.98     | 118.31±2.83     | 154.15hijklm  |
| <i>Gmelina arborea</i> based      | 184.00±2.20    | 150.02±1.65     | 123.08±3.14     | 152.37ijklmn  |
| <i>Millettia pinnata</i> based    | 206.57±8.84    | 143.00±8.50     | 131.16±2.31     | 160.24bghijk  |
| L i based                         | 202.71±4.05    | 140.78±5.14     | 122.67±2.33     | 155.39ghijklm |
| A c based                         | 191.38±4.29    | 132.33±9.06     | 124.58±3.29     | 149.43klmn    |
| <i>Mangifera indica</i> based     | 185.14±2.45    | 166.59±5.01     | 126.25±3.99     | 159.33ghijkl  |
| Homegarden                        | 250.92±8.29    | 220.53±5.32     | 217.68±8.54     | 230.76b       |
| <b>Commercial Crop Plantation</b> |                |                 |                 |               |
| <i>Hevea brasiliensis</i>         | 198.82±6.13    | 153.46±8.36     | 111.62±1.69     | 154.64hijklm  |
| <i>Cocos nucifera</i>             | 190.37±7.32    | 143.95±8.05     | 112.74±1.67     | 149.02klmn    |
| <i>Areca catechu</i>              | 210.12±2.57    | 132.29±8.90     | 105.88±1.45     | 149.43klmn    |
| <i>Machilus bombycina</i>         | 186.16±11.19   | 153.40±5.26     | 105.51±0.91     | 148.36lmn     |
| Tea plantations                   | 261.41±9.84    | 172.80±1.75     | 108.44±6.64     | 180.89e       |
| <b>Fruit Orchard</b>              |                |                 |                 |               |
| <i>Psidium guajava</i>            | 209.17±6.63    | 184.77±8.74     | 154.75±4.37     | 182.90e       |
| <i>Manilkara zapota</i>           | 192.23±11.22   | 170.24±9.28     | 156.37±7.24     | 172.95ef      |
| <i>Litchi chinensis</i>           | 209.88±0.96    | 177.13±4.90     | 145.45±3.46     | 177.49e       |
| A o                               | 193.72±6.94    | 160.41±7.30     | 144.46±4.06     | 166.20fg      |
| <i>Citrus lemon</i>               | 190.84±9.76    | 169.40±1.72     | 157.00±1.48     | 172.75ef      |
| <i>Mangifera indica</i>           | 196.77±6.28    | 157.62±4.67     | 141.23±4.60     | 165.21fgh     |
| <b>Mean</b>                       | <b>209.17a</b> | <b>164.71b</b>  | <b>140.03c</b>  |               |

TBLS- tree-based land-use system; L p- *Lagerstroemia parviflora*; A c- *Anthocephalus cadamba*; T g + M m- *Tectona grandis* + *Milvus migrans*; S m- *Swietenia macrophylla*; T a- *Terminalia arjuna*; L i- *Lagerstroemia indica*; A o- *Anacardium occidentale*

**Supplementary Table S7. Effect of tree-based land-use systems on soil available phosphorus (kg ha<sup>-1</sup>) at different depths**

| Tree based land use system         | 0-20 cm    | 20-40 cm   | 40-60 cm   | Mean      |
|------------------------------------|------------|------------|------------|-----------|
| <b>Forest</b>                      |            |            |            |           |
| <i>Lagerstroemia parviflora</i>    | 25.77±0.72 | 19.39±0.88 | 18.14±0.87 | 21.10cd   |
| <i>Michelia champaca</i>           | 25.08±0.91 | 18.91±0.92 | 17.49±0.72 | 20.49d    |
| <i>Tectona grandis</i>             | 26.33±0.88 | 22.94±1.01 | 18.09±0.92 | 22.45b    |
| <i>Shorea robusta</i>              | 26.48±0.52 | 21.06±0.93 | 18.45±0.91 | 22.00bc   |
| Mixed                              | 30.15±0.54 | 24.42±0.52 | 19.62±0.58 | 24.73a    |
| <b>Forest Tree Plantation</b>      |            |            |            |           |
| <i>Swietenia macrophylla</i>       | 19.33±1.20 | 18.33±0.88 | 15.58±0.89 | 17.75f    |
| <i>Anthocephalus cadamba</i>       | 17.23±0.62 | 15.03±0.65 | 14.87±0.87 | 15.71hijk |
| <i>Gmelina arborea</i>             | 18.16±1.19 | 16.06±0.67 | 15.48±1.10 | 16.57fghi |
| <i>Shorea borneensis</i>           | 19.31±0.56 | 16.13±0.64 | 15.01±0.58 | 16.82fghi |
| <i>Tectona grandis</i>             | 18.02±0.81 | 16.20±0.74 | 15.96±1.01 | 16.73fghi |
| <i>Lagerstroemia indica</i>        | 17.33±1.20 | 17.37±0.69 | 15.23±0.87 | 16.64fghi |
| T g + M m                          | 16.45±1.18 | 16.36±1.05 | 14.25±0.90 | 15.68hijk |
| A c + S m                          | 18.21±0.85 | 17.12±0.47 | 15.87±1.02 | 17.07fgh  |
| <b>Agroforestry</b>                |            |            |            |           |
| <i>Albizia lebbek</i> based        | 16.16±1.04 | 15.68±0.87 | 15.02±0.57 | 15.62ijk  |
| <i>Swietenia macrophylla</i> based | 17.34±1.20 | 16.30±0.58 | 15.22±0.91 | 16.29ghij |
| <i>Terminalia arjuna</i> based     | 18.03±0.89 | 18.09±0.58 | 16.43±0.97 | 17.52fg   |
| <i>Gmelina arborea</i> based       | 17.35±1.20 | 15.21±0.41 | 15.16±0.70 | 15.90hij  |
| <i>Millettia pinnata</i> based     | 16.05±0.80 | 14.89±0.87 | 14.22±0.40 | 15.05jk   |
| <i>Lagerstroemia indica</i> based  | 17.11±1.06 | 15.57±0.65 | 14.05±0.53 | 15.58ijk  |
| A c based                          | 16.18±0.24 | 14.67±0.89 | 14.09±0.48 | 14.98jk   |
| <i>Mangifera indica</i> based      | 17.21±0.58 | 15.08±0.99 | 16.13±0.65 | 16.14ghij |
| Homegarden                         | 23.37±0.35 | 19.82±1.02 | 14.20±0.93 | 19.13e    |
| <b>Commercial Crop Plantation</b>  |            |            |            |           |
| <i>Hevea brasiliensis</i>          | 19.20±0.86 | 14.04±0.54 | 13.16±0.45 | 15.47ijk  |
| <i>Cocos nucifera</i>              | 16.68±0.61 | 16.07±0.49 | 15.47±0.65 | 16.07hij  |
| <i>Areca catechu</i>               | 17.33±0.88 | 16.16±0.43 | 13.34±0.41 | 15.61ijk  |
| <i>Machilus bombycina</i>          | 18.60±0.74 | 14.34±0.34 | 11.91±0.35 | 14.95jk   |
| Tea plantations                    | 28.22±0.51 | 23.43±0.66 | 21.94±1.04 | 24.53a    |
| <b>Fruit Orchard</b>               |            |            |            |           |
| <i>Psidium guajava</i>             | 16.16±0.60 | 15.03±0.58 | 13.70±0.45 | 14.96jk   |
| <i>Manilkara zapota</i>            | 15.11±0.88 | 14.04±0.51 | 13.96±0.77 | 14.37k    |
| <i>Litchi chinensis</i>            | 16.19±0.67 | 15.54±0.36 | 15.02±0.71 | 15.58ijk  |
| <i>Anacardium occidentale</i>      | 14.05±0.76 | 13.09±0.58 | 11.62±0.30 | 12.92l    |
| <i>Citrus lemon</i>                | 15.53±0.40 | 11.34±0.34 | 10.68±0.18 | 12.52l    |
| <i>Mangifera indica</i>            | 14.25±0.61 | 12.17±0.58 | 10.43±0.49 | 12.28l    |
| <b>Mean</b>                        | 19.03a     | 16.68b     | 15.13c     |           |

T g- *Tectona grandis*; M m- *Milvus migrans*; A c- *Anthocephalus cadamba*; S m- *Swietenia macrophylla*

**Supplementary Table S8. Effect of tree-based land-use systems on soil available potassium (Kg ha<sup>-1</sup>) at different depths**

| TBLS                              | 0-20 cm     | 20-40 cm     | 40-60 cm    | Mean        |
|-----------------------------------|-------------|--------------|-------------|-------------|
| <b>Forest</b>                     |             |              |             |             |
| L p                               | 122.16±9.11 | 116.32±2.33  | 113.28±7.41 | 117.25d     |
| <i>Michelia champaca</i>          | 124.74±5.26 | 103.25±6.63  | 90.26±6.00  | 106.08cd    |
| <i>Tectona grandis</i>            | 118.48±1.04 | 110.66±5.81  | 101.40±7.02 | 110.18bc    |
| <i>Shorea robusta</i>             | 129.49±0.84 | 124.92±2.89  | 90.26±6.00  | 114.89bc    |
| Mixed                             | 141.14±6.05 | 131.74±4.28  | 114.92±2.69 | 129.27a     |
| <b>Tree Plantation</b>            |             |              |             |             |
| <i>Swietenia macrophylla</i>      | 86.10±4.61  | 83.07±4.62   | 78.60±1.05  | 82.50ghi    |
| <i>Anthocephalus cadamba</i>      | 88.17±1.57  | 73.69±4.82   | 64.38±3.96  | 75.41gklmn  |
| <i>Gmelina arborea</i>            | 87.61±1.46  | 71.45±2.61   | 64.10±3.15  | 74.38ijklm  |
| <i>Shorea borneensis</i>          | 91.01±2.77  | 75.18±3.46   | 63.97±7.27  | 76.72hijklm |
| <i>Tectona grandis</i>            | 89.23±2.32  | 59.25±5.31   | 54.74±2.90  | 67.74mn     |
| <i>Lagerstroemia indica</i>       | 87.62±2.21  | 66.27±3.33   | 57.44±3.77  | 70.44jklmn  |
| T g + M m                         | 90.15±4.05  | 88.50±1.63   | 65.54±7.29  | 81.40ghij   |
| A c + S m                         | 112.60±7.28 | 103.03±2.45  | 76.80±4.11  | 97.48de     |
| <b>Agroforestry</b>               |             |              |             |             |
| <i>Albizia lebbbeck</i> based     | 126.23±3.77 | 116.48±10.75 | 85.74±5.74  | 109.48bc    |
| S m based                         | 100.41±6.13 | 99.74±0.85   | 81.53±7.14  | 93.89ef     |
| <i>Terminalia arjuna</i> based    | 94.24±2.65  | 86.62±2.15   | 71.07±6.72  | 83.98ghi    |
| <i>Gmelina arborea</i> based      | 84.36±4.43  | 80.31±5.50   | 63.94±6.99  | 76.20hijklm |
| <i>Millettia pinnata</i> based    | 75.50±8.67  | 66.81±1.98   | 50.72±5.74  | 64.34n      |
| L i based                         | 90.29±2.15  | 71.54±4.50   | 67.38±3.74  | 76.40hijklm |
| A c based                         | 109.09±5.84 | 83.43±2.10   | 54.60±7.91  | 82.37ghi    |
| <i>Mangifera indica</i> based     | 91.35±2.85  | 82.53±7.58   | 79.85±0.88  | 84.58fghi   |
| Homegarden                        | 87.62±1.92  | 79.92±3.79   | 75.75±8.15  | 81.10ghij   |
| <b>Commercial Crop Plantation</b> |             |              |             |             |
| <i>Hevea brasiliensis</i>         | 107.91±1.10 | 81.53±7.14   | 69.47±5.32  | 86.30fgh    |
| <i>Cocos nucifera</i>             | 93.27±5.64  | 83.82±7.87   | 71.44±8.32  | 82.84ghi    |
| <i>Areca catechu</i>              | 106.40±4.03 | 82.72±3.68   | 78.17±9.22  | 89.10fg     |
| <i>Machilus bombycina</i>         | 94.21±4.53  | 91.55±7.16   | 71.07±6.72  | 85.61fgh    |
| Tea plantations                   | 123.19±4.64 | 98.47±7.94   | 72.67±6.46  | 98.11de     |
| <b>Fruit Orchard</b>              |             |              |             |             |
| <i>Psidium guajava</i>            | 107.76±3.68 | 99.40±2.43   | 84.94±4.94  | 97.37de     |
| <i>Manilkara zapota</i>           | 99.57±2.40  | 78.46±8.01   | 61.23±9.19  | 79.75ghijk  |
| <i>Litchi chinensis</i>           | 103.59±2.61 | 76.64±4.04   | 56.20±6.11  | 78.81hijkl  |
| <i>Anacardium occidentale</i>     | 94.44±3.55  | 75.54±2.62   | 55.41±3.93  | 75.13ijklm  |
| <i>Citrus lemon</i>               | 93.24±7.41  | 64.57±4.90   | 51.77±4.24  | 69.86klmn   |
| <i>Mangifera indica</i>           | 94.59±2.32  | 61.79±6.05   | 51.03±5.60  | 69.14lmn    |
| <b>Mean</b>                       | 100.85a     | 86.95b       | 72.42c      |             |

TBLS- Tree-based land-use system; L p- *Lagerstroemia parviflora*; T g- *Tectona grandis*; M m- *Milvus migrans*; A c- *Anthocephalus cadamba*; S m- *Swietenia macrophylla*; L i- *Lagerstroemia indica*

**Supplementary Table S9. Effect of tree-based land-use systems on biomass carbon stock and partitioning (Mg ha<sup>-1</sup>)**

| TBLS                          | TC                | SC               | HC              | TPC              | AGC               | BGC              | LC               | TBC               |
|-------------------------------|-------------------|------------------|-----------------|------------------|-------------------|------------------|------------------|-------------------|
| <b>Forest</b>                 |                   |                  |                 |                  |                   |                  |                  |                   |
| L p                           | 65.18<br>*(1.8)c  | 5.70<br>(0.8)c   | 1.61<br>(0.4)c  | 72.49<br>(1.9)c  | 63.03<br>(1.81)c  | 9.45<br>(1.0)c   | 7.05<br>(0.9)a   | 79.54<br>(1.9)c   |
| M c                           | 70.35<br>(1.9)c   | 5.10<br>(0.8)c   | 1.70<br>(0.4)c  | 77.15<br>(1.9)c  | 67.08<br>(1.83)c  | 10.06<br>(1.0)c  | 4.68<br>(0.8)b   | 81.82<br>(1.9)c   |
| T g                           | 69.84<br>(1.9)c   | 5.27<br>(0.8)c   | 2.07<br>(0.5)b  | 77.18<br>(1.9)c  | 67.11<br>(1.83)c  | 10.07<br>(1.0)c  | 7.24<br>(0.9)a   | 84.42<br>(1.9)c   |
| S r                           | 128.0<br>(2.1)b   | 3.72<br>(0.7)d   | 1.40<br>(0.4)cd | 133.1<br>(2.1)b  | 115.77<br>(2.07)b | 17.37<br>(1.3)b  | 6.21<br>(0.9)a   | 139.35<br>(2.15)b |
| Mixed                         | 371.6<br>(2.6)a   | 8.90<br>(0.9)b   | 3.31<br>(0.6)a  | 383.8<br>(2.6)a  | 333.74<br>(2.52)a | 50.06<br>(1.7)a  | 6.80<br>(0.9)a   | 390.61<br>(2.59)a |
| <b>Forest Tree Plantation</b> |                   |                  |                 |                  |                   |                  |                  |                   |
| S m                           | 19.57<br>(1.3)h   | 1.03<br>(0.3)g   | 0.47<br>(0.2)gh | 21.06<br>(1.3)h  | 18.31<br>(1.29)h  | 2.75<br>(0.6)g   | 1.79<br>(0.5)d   | 22.85<br>(1.38)i  |
| A c                           | 29.14<br>(1.5)f   | 0.45<br>(0.2)jkl | 0.58<br>(0.20)g | 30.17<br>(1.5)g  | 26.23<br>(1.43)g  | 3.94<br>(0.7)f   | 1.75<br>(0.4)a   | 31.92<br>(1.52)gh |
| G a                           | 13.68<br>(1.2)ij  | 0.77<br>(0.25)hi | 0.46<br>(0.2)gh | 14.91<br>(1.2)i  | 12.96<br>(1.14)i  | 1.94<br>(0.5)h   | 1.16<br>(0.3)e   | 16.07<br>(1.23)j  |
| S b                           | 13.80<br>(1.2)ij  | 0.99<br>(0.3)gh  | 0.43<br>(0.2)gh | 15.22<br>(1.2)i  | 13.23<br>(1.15)i  | 1.99<br>(0.5)h   | 0.87<br>(0.3)f   | 16.09<br>(1.23)j  |
| T g                           | 11.32<br>(1.1)kl  | 0.95<br>(0.3)gh  | 0.45<br>(0.2)gh | 12.72<br>(1.1)ij | 11.06<br>(1.08)ij | 1.66<br>(0.4)hij | 0.48<br>(0.2)gh  | 13.21<br>(1.2)jkl |
| L i                           | 19.52<br>(1.3)h   | 0.78<br>(0.25)hi | 1.18<br>(0.3)de | 21.47<br>(1.4)h  | 18.67<br>(1.29)h  | 2.80<br>(0.58)g  | 2.26<br>(0.51)c  | 23.74<br>(1.39)i  |
| T g+M m                       | 41.11<br>(1.6)e   | 0.59<br>(0.20)ij | 0.42<br>(0.15)h | 42.12<br>(1.6)ef | 36.62<br>(1.57)ef | 5.49<br>(0.81)e  | 0.87<br>(0.27)f  | 42.99<br>(1.64)ef |
| A c+ S m                      | 51.95<br>(1.7)d   | 2.77<br>(0.57)e  | 1.06<br>(0.31)e | 55.78<br>(1.8)d  | 48.50<br>(1.69)d  | 7.28<br>(0.92)d  | 0.15<br>(0.06)i  | 55.93<br>(1.75)d  |
| <b>Agroforestry</b>           |                   |                  |                 |                  |                   |                  |                  |                   |
| A l b                         | 8.83<br>(0.9)mn   | 0.40<br>(0.15)kl | 0.02<br>(0.01)k | 9.25<br>(1.0)l   | 8.04<br>(0.95)l   | 1.21<br>(0.34)kl | 0.03<br>(0.01)k  | 9.28<br>(1.01)h   |
| S m b                         | 39.72<br>(1.6)e   | 0.66<br>(0.22)i  | 0.03<br>(0.01)k | 40.41<br>(1.6)ef | 35.13<br>(1.56)ef | 5.27<br>(0.80)e  | 1.50<br>(0.40)d  | 41.91<br>(1.63)ef |
| T a b                         | 12.76<br>(1.1)ijk | 0.25<br>(0.1)mn  | 0.06<br>(0.03)k | 13.07<br>(1.2)ij | 11.36<br>(1.09)ij | 1.70<br>(0.43)hi | 0.01<br>(0.00)k  | 13.08<br>(1.15)kl |
| G a b                         | 14.15<br>(1.18)i  | 0.97<br>(0.3)gh  | 0.25<br>(0.10)i | 15.38<br>(1.2)i  | 13.37<br>(1.16)i  | 2.01<br>(0.48)h  | 0.01<br>(0.01)k  | 15.39<br>(1.21)jk |
| M p b                         | 6.77<br>(0.9)op   | 0.16<br>(0.1)no  | 0.03<br>(0.01)k | 6.97<br>(0.9)m   | 6.06<br>(0.85)m   | 0.91<br>(0.3)mn  | 0.04<br>(0.02)jk | 7.00<br>(0.90)o   |
| L i b                         | 7.93<br>(0.9)no   | 0.32<br>(0.1)lm  | 0.44<br>(0.2)gh | 8.69<br>(0.9)l   | 7.56<br>(0.93)l   | 1.13<br>(0.3)lm  | 0.02<br>(0.01)k  | 8.71<br>(0.98)n   |
| A c b                         | 24.61<br>(1.4)fg  | 0.67<br>(0.22)i  | 0.15<br>(0.06)j | 25.43<br>(1.4)gh | 22.11<br>(1.4)gh  | 3.32<br>(0.63)f  | 0.52<br>(0.2)gh  | 25.95<br>(1.43)i  |
| M i b                         | 9.68              | 0.47             | 0.03            | 10.18            | 8.85              | 1.33             | 0.04             | 10.22             |

|                                    |          |          |          |          |          |          |          |          |
|------------------------------------|----------|----------|----------|----------|----------|----------|----------|----------|
|                                    | (1.0)mn  | (0.17)jk | (0.01)k  | (1.05)kl | (0.99)kl | (0.37)kl | (0.02)jk | (1.1)mn  |
| Hg                                 | 45.08    | 1.36     | 0.76     | 47.20    | 41.05    | 6.16     | 1.49     | 48.69    |
|                                    | (1.7)de  | (0.37)f  | (0.25)f  | (1.7)de  | (1.6)de  | (0.85)e  | (0.39)d  | (1.7)de  |
| <b>Commercial Plantation Crops</b> |          |          |          |          |          |          |          |          |
| H b                                | 25.68    | 0.37     | 0.37     | 26.42    | 22.98    | 3.45     | 0.62     | 27.05    |
|                                    | (1.4)fg  | (0.14)ij | (0.14)h  | (1.44)g  | (1.38)g  | (0.65)f  | (0.21)g  | (1.45)hi |
| C n                                | 10.36    | 0.04     | 0.02     | 10.42    | 9.06     | 1.36     | 0.02     | 10.44    |
|                                    | (1.1)klm | (0.02)p  | (0.01)k  | (1.06)kl | (1.00)kl | (0.4)jkl | (0.01)k  | (1.1)mn  |
| A c                                | 8.93     | 0.03     | 0.04     | 8.99     | 7.82     | 1.17     | 0.01     | 9.00     |
|                                    | (1.0)mn  | (0.01)p  | (0.02)k  | (1.00)l  | (0.95)l  | (0.34)l  | (0.00)k  | (1.00)n  |
| M b                                | 8.72     | 0.37     | 0.81     | 9.89     | 8.60     | 1.29     | 0.53     | 10.42    |
|                                    | (0.9)mn  | (0.1)klm | (0.26)f  | (1.04)l  | (0.98)kl | (0.36)kl | (0.2)gh  | (1.1)mn  |
| T P                                | 23.58    | 14.62    | 0.21     | 38.41    | 32.65    | 5.76     | 0.13     | 38.54    |
|                                    | (1.4)gh  | (1.19)a  | (0.08)ij | (1.59)f  | (1.52)f  | (0.82)e  | (0.05)ij | (1.6)fg  |
| <b>Fruit Orchard</b>               |          |          |          |          |          |          |          |          |
| P g                                | 3.16     | 0.14     | 0.03     | 3.33     | 2.90     | 0.43     | 0.01     | 3.34     |
|                                    | (0.6)qr  | (0.06)o  | (0.01)k  | (0.6)no  | (0.6)no  | (0.16)o  | (0.01)k  | (0.6)pq  |
| M z                                | 6.27     | 0.08     | 0.04     | 6.39     | 5.56     | 0.83     | 0.06     | 6.45     |
|                                    | (0.9)p   | (0.03)op | (0.02)k  | (0.86)m  | (0.81)m  | (0.26)n  | (0.02)jk | (0.87)o  |
| L c                                | 3.91     | 0.03     | 0.03     | 3.98     | 3.46     | 0.52     | 0.05     | 4.02     |
|                                    | (0.7)q   | (0.01)p  | (0.01)k  | (0.70)n  | (0.65)n  | (0.18)o  | (0.02)jk | (0.70)p  |
| A o                                | 8.93     | 0.07     | 0.03     | 9.03     | 7.85     | 1.18     | 0.44     | 9.47     |
|                                    | (1.0)mn  | (0.03)op | (0.01)k  | (1.00)l  | (0.95)l  | (0.34)l  | (0.16)h  | (1.02)n  |
| C l                                | 3.08     | 0.02     | 0.01     | 3.10     | 2.70     | 0.40     | 0.04     | 3.14     |
|                                    | (0.6)r   | (0.01)p  | (0.00)k  | (0.61)o  | (0.57)o  | (0.15)o  | (0.02)jk | (0.62)q  |
| M i                                | 11.31    | 0.10     | 0.04     | 11.44    | 9.95     | 1.49     | 0.40     | 11.85    |
|                                    | (1.1)jkl | (0.04)op | (0.02)k  | (1.09)k  | (1.04)k  | (0.4)ijk | (0.15)h  | (1.1)lm  |
| S <sub>em</sub>                    | 0.03     | 0.02     | 0.02     | 0.03     | 0.03     | 0.02     | 0.02     | 0.03     |
| CD <sub>p=0.05</sub>               | 0.08     | 0.05     | 0.05     | 0.07     | 0.07     | 0.05     | 0.05     | 0.07     |

\*figures in parenthesis are log transformed values; TBLS- Tree-based land-use system; *L p- Lagerstroemia parviflora*; *M c- Michelia champaca*; *T g- Tectona grandis*; *S r- Shorea robusta*; *S m- Swietenia macrophylla*; *A c- Anthocephalus cadamba*; *G a- Gmelina arborea*; *S b- Shorea borneensis*; *L i- Lagerstroemia indica*; *M m- Milvus migrans*; *A l b- Albizia lebeck* based; *S m b- Swietenia macrophylla* based; *T a b- Terminalia arjuna* based; *G a b- Gmelina arborea* based; *M p b- Millettia pinnata* based; *L i b- Lagerstroemia indica* based; *A c b- Anthocephalus cadamba* based; *M i b- Mangifera indica* based; Hg- homegarden; *H b- Hevea brasiliensis*; *C n- Cocos nucifera*; *A c- Areca catechu*; *M b- Machilus bombycina*; T P- tea plantation; *P g- Psidium guajava*; *M z- Manilkara zapota*; *L c- Litchi chinensis*; *A o- Anacardium occidentale*; *C l- Citrus lemon*; *M i- Mangifera indica*; TC- tree carbon; SC- shrub carbon, HC- herb carbon; TPC- total plant carbon; AGC- above ground carbon; BGC- below ground carbon; L C- litter carbon; TBC- total biomass carbon

**Supplementary Table S10. Effect of tree-based land-use system on ecosystem carbon (Mg ha<sup>-1</sup>)**

| TBLS                               | TPC           | L <sub>t</sub> C | SOC             | E <sub>m</sub> C |
|------------------------------------|---------------|------------------|-----------------|------------------|
| <b>Forest</b>                      |               |                  |                 |                  |
| L p                                | 72.49(1.87)*c | 7.05(0.90)ab     | 113.77(2.06)b   | 193.31(2.29)c    |
| M c                                | 77.15(1.89)c  | 4.68(0.75)c      | 108.73(2.04)bc  | 190.55(2.28)c    |
| T g                                | 77.18(1.89)c  | 7.24(0.91)a      | 105.51(2.03)bc  | 189.93(2.28)c    |
| S r                                | 133.13(2.13)b | 6.21(0.86)b      | 110.82(2.05)bc  | 250.16(2.40)b    |
| Mixed                              | 383.81(2.58)a | 6.80(0.89)ab     | 126.67(2.11)a   | 517.27(2.71)a    |
| <b>Forest Tree Plantation</b>      |               |                  |                 |                  |
| S m                                | 21.06(1.34)h  | 1.79(0.45)e      | 64.58(1.82)e    | 87.44(1.95)fgh   |
| A c                                | 30.17(1.49)g  | 1.75(0.44)e      | 63.64(1.81)ef   | 95.55(1.98)fgh   |
| G a                                | 14.91(1.20)i  | 1.16(0.33)f      | 60.00(1.8)efgh  | 76.07(1.89)hijk  |
| S b                                | 15.22(1.21)i  | 0.87(0.27)g      | 60.03(1.8)efgh  | 76.12(1.88)ijk   |
| T g                                | 12.72(1.14)ij | 0.48(0.17)hi     | 61.50(1.8)efgh  | 74.70(1.88)ijk   |
| L i                                | 21.47(1.35)h  | 2.26(0.51)d      | 60.48(1.8)efgh  | 84.21(1.93)fgh   |
| T g + M m                          | 42.12(1.63)fg | 0.87(0.27)g      | 60.00(1.8)efgh  | 102.99(2.02)efg  |
| A c + S m                          | 55.78(1.75)d  | 0.15(0.06)j      | 60.07(1.8)efgh  | 116.02(2.07)e    |
| <b>Agroforestry</b>                |               |                  |                 |                  |
| A l based                          | 9.25(1.01)l   | 0.03(0.01)j      | 61.85(1.8)efgh  | 71.14(1.86)ijk   |
| S m based                          | 40.41(1.62)ef | 1.50(0.40)e      | 62.49(1.8)efgh  | 104.40(2.02)efg  |
| T a based                          | 13.07(1.15)ij | 0.01(0.00)j      | 60.58(1.8)efgh  | 73.65(1.87)ijk   |
| G a based                          | 15.38(1.21)i  | 0.01(0.01)j      | 61.91(1.8)efgh  | 77.31(1.89)hijk  |
| M p based                          | 6.97(0.90)m   | 0.04(0.02)j      | 61.01(1.8)efgh  | 68.03(1.8)jklm   |
| L I based                          | 8.69(0.98)l   | 0.02(0.01)j      | 62.44(1.82)e    | 71.14(1.86)ijk   |
| A c based                          | 25.43(1.42)g  | 0.52(0.18)hi     | 61.94(1.80)efgh | 87.90(1.95)fgh   |
| M i based                          | 10.18(1.05)kl | 0.04(0.02)j      | 60.9(1.79)efgh  | 71.12(1.86)ijk   |
| Hg                                 | 47.20(1.68)d  | 1.49(0.39)e      | 90.34(1.96)d    | 139.02(2.15)d    |
| <b>Commercial Plantation Crops</b> |               |                  |                 |                  |
| H b                                | 26.42(1.44)g  | 0.62(0.21)h      | 60.05(1.8)efgh  | 87.10(1.94)fgh   |
| C n                                | 10.42(1.06)kl | 0.02(0.01)j      | 60.8(1.79)efgh  | 71.24(1.86)ijk   |
| A c                                | 8.99(1.00)l   | 0.01(0.00)j      | 63.59(1.81)efg  | 72.60(1.87)ijk   |
| M b                                | 9.89(1.04)kl  | 0.53(0.19)hi     | 63.24(1.81)efg  | 73.66(1.87)ijk   |
| T p                                | 38.41(1.59)f  | 0.13(0.05)j      | 103.19(2.02)c   | 141.74(2.15)d    |
| <b>Fruit Orchard</b>               |               |                  |                 |                  |
| P g                                | 3.33(0.64)no  | 0.01(0.01)j      | 59.40(1.8)efgh  | 62.74(1.8)jklm   |
| M z                                | 6.39(0.86)m   | 0.06(0.02)j      | 60.04(1.8)efgh  | 66.48(1.83)jklm  |
| L c                                | 3.98(0.70)n   | 0.05(0.02)j      | 57.45(1.77)h    | 61.48(1.80)jklm  |
| A o                                | 9.03(1.00)l   | 0.44(0.16)hi     | 58.72(1.78)fgh  | 68.19(1.84)jklm  |
| C l                                | 3.10(0.61)o   | 0.04(0.02)j      | 57.63(1.77)gh   | 60.77(1.79)jklm  |
| M i                                | 11.44(1.09)jk | 0.40(0.15)i      | 58.31(1.77)fgh  | 70.16(1.85)ijk   |
| S <sub>em</sub>                    | <b>0.03</b>   | <b>0.02</b>      | <b>0.01</b>     | <b>0.02</b>      |
| CD <sub>p=0.05</sub>               | <b>0.07</b>   | <b>0.05</b>      | <b>0.04</b>     | <b>0.06</b>      |

\*figures in parenthesis are log transformed values; TBLS- Tree-based land-use system; L p- *Lagerstroemia parviflora*; M c- *Michelia champaca*; T g- *Tectona grandis*; S r- *Shorea robusta*; S m- *Swietenia macrophylla*; A c- *Anthocephalus cadamba*; G a- *Gmelina arborea*; S b- *Shorea borneensis*; L i- *Lagerstroemia indica*; M m- *Milvus migrans*; A l- *Albizia lebbek*; T a- *Terminalia arjuna*; M p- *Milletia pinnata*; L i- *Lagerstroemia indica*; M i- *Mangifera indica*; Hg- homegarden; H b- *Hevea brasiliensis*; C n- *Cocos nucifera*; A c- *Areca catechu*; M b- *Machilus bombycina*; T p- tea plantations; P g- *Psidium guajava*; M z- *Manilkara zapota*; L c- *Litchi chinensis*; A o- *Anacardium occidentale*; C l- *Citrus lemon*; TPC- total plant carbon; L<sub>t</sub> C- litter carbon; SOC- soil organic carbon (up to 60 cm soil depth); EC- ecosystem carbon
